# Supplementary material
Source: MDPI journal article supplement (https://www.mdpi.com/2073-4468/10/1/6)

Supplementary Figure S2

**T47D**

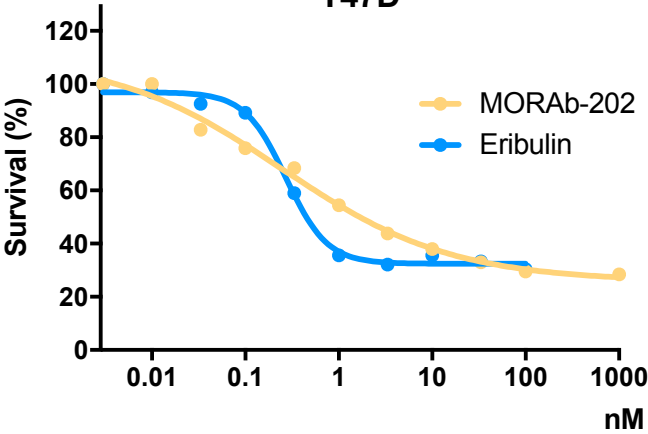

**MDA-MB-361**

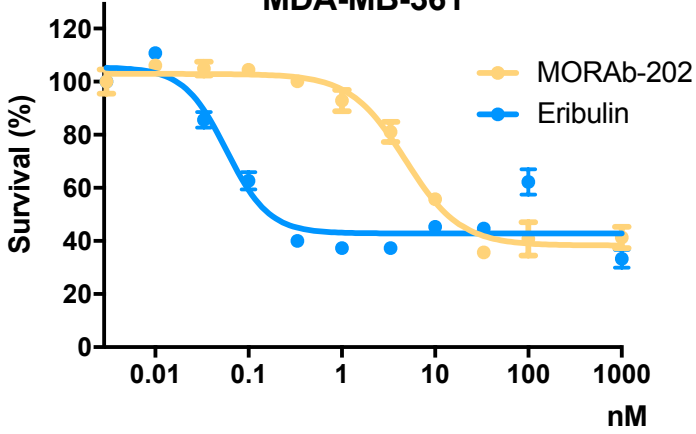

**HCC1954**

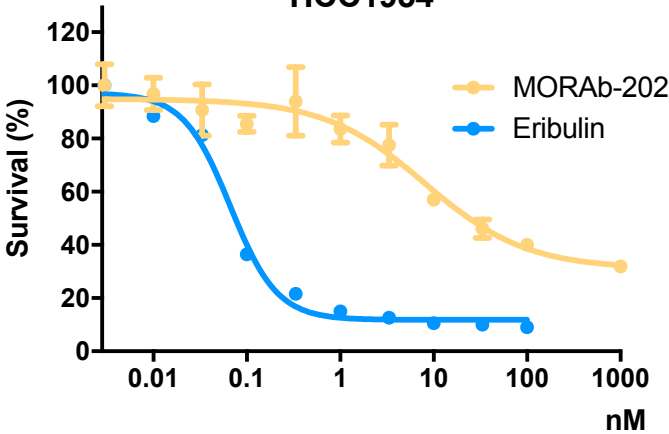

**MDA-MB-231**

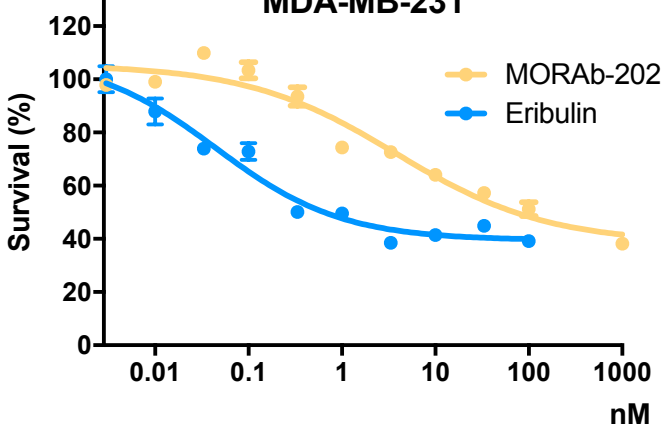

Supplement: s1 [file s1]

Supplementary Figure S1

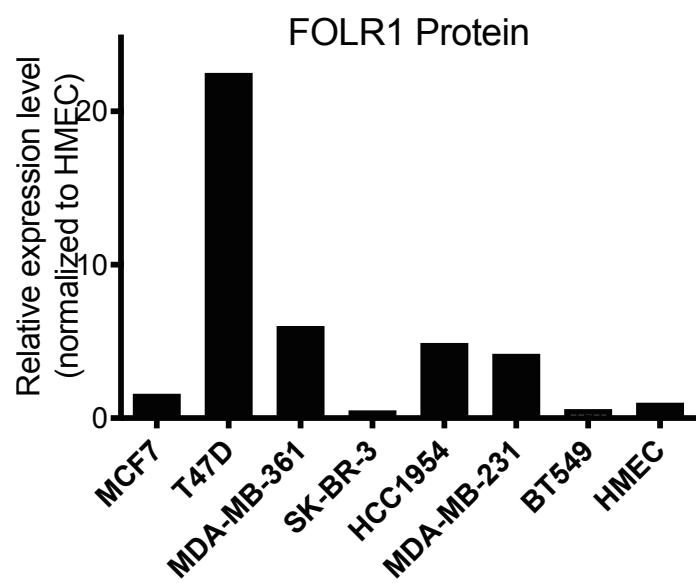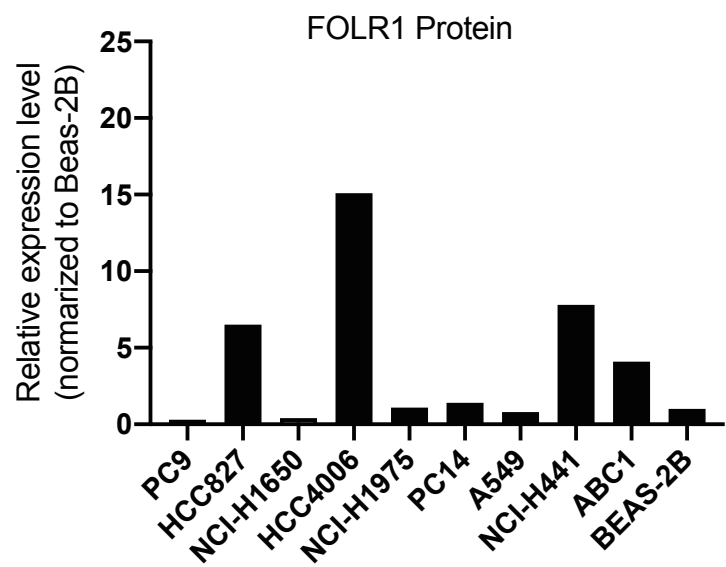

Supplement: s1 [file s1]
